# Supplementary material
Source: PubMed Central journal article supplement (PMC3205850)
Supplement: supp_11-0448_DOI-_10.1378.chest.11-0448.pdf [file supp_11-0448_DOI-_10.1378.chest.11-0448.pdf]

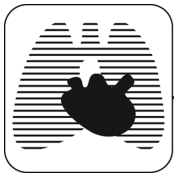

## Salivary Cortisol Can Replace Free Serum Cortisol Measurements in Patients With Septic Shock

Rosa M. Estrada-Y - Martin, MD, FCCP; and Philip R. Orlander, MD

### e-Appendix 1. Patients' Characteristics

| Patient Characteristics                 | N = 38 (%)        | range            |
|-----------------------------------------|-------------------|------------------|
| Age (mean, SD)                          | 57.7 (20.1)       | 18 - 97          |
| Gender                                  |                   |                  |
| Women                                   | 19 (50)           |                  |
| Men                                     | 19 (50)           |                  |
| Admission Category                      |                   |                  |
| Medical admission                       | 33 (86)           |                  |
| Emergency Surgery                       | 3 (8)             |                  |
| Elective Surgery                        | 2 (5)             |                  |
| Mortality (%)                           | 14 (37)           |                  |
| Severity of Illness                     | mean (SD)         | range            |
| Temperature °C                          | 37.1 (1.7)        | 32.9 - 40.2      |
| Heart Rate beats/min                    | 105 (28)          | 50 - 170         |
| Mean Arterial Pressure mmHg             | 56 (7)            | 38 - 68          |
| APACHE II                               | 24 (7)            | 10 - 42          |
| SAPS II                                 | 54 (17)           | 13 - 89          |
| SOFA                                    | 12 (3)            | 5 - 20           |
| Creatinine mg/dL                        | 3 (2.3)           | 0.5 - 9.5        |
| BUN mg/dL                               | 38.5 (24.2)       | 3 - 101          |
| Serum bicarbonate mg/dL                 | 19.5 (4.2)        | 12 - 29          |
| Albumin g/dL                            | 1.9 (0.6)         | 0.9 - 3.1        |
| Hemoglobin g/dL                         | 8.9 (1.9)         | 4.4 - 13.6       |
| Leukocytes x 103/μL                     | 17,584 (12,738)   | 3,000 - 69,000   |
| Platelet count x 103/μL                 | 192,842 (132,321) | 22,000 - 570,000 |
| Aspartate aminotransferase mg/dL        | 158 (439)         | 12 - 2,600       |
| Alanine aminotransferase mg/dL          | 108 (260)         | 11 - 1,491       |
| PaO <sub>2</sub> /FiO <sub>2</sub> mmHg | 234 (118)         | 57 - 512         |
| Vasopressors                            | mean (SD)         | range            |
| Dopamine μg/kg/min                      | 9 (1.4)           | 8 - 10           |
| Norepinephrine μg/min                   | 16.4 (22.1)       | 1 - 100          |
| Phenylephrine μg/min                    | 80 (0)            | 80 - 80          |
| Vasopressin unit/min                    | 0.04 (0)          | 0.04 - 0.04      |

*Online supplements are not copyedited prior to posting.*

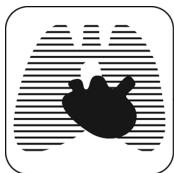

### e-Appendix 2. Cortisol and Cortisol Binding Globulin\*

|                           | µg/dL mean (SD)                 | range       | nmol/L mean (SD) | range            | µg/dL median (25th-75th**)                 | nmol/L median (25th-75th**) |
|---------------------------|---------------------------------|-------------|------------------|------------------|--------------------------------------------|-----------------------------|
| Free Serum Cortisol       | 2.27 (1.64)                     | 0.09 - 7.15 | 62.63 ( 45.25)   | 2.48 - 197.27    | 1.95 (1.24 - 3.15)                         | 53.80 (34.21 - 86.91)       |
| Total Serum Cortisol      | 21.56 (8.71)                    | 4.9 - 44.5  | 601.52 ( 243.01) | 135.19 - 1227.75 | 21.40 (15.90 - 27.15)                      | 590.43 (438.68 - 749.07)    |
| Cortisol Binding Globulin | mg/dL mean (SD)<br>23.54 (8.33) | 9 - 50      |                  |                  | mg/dL median (25th-75th**)<br>23 (17 - 29) |                             |

\* 57 patients

\*\* percentile

*Online supplements are not copyedited prior to posting.*
